# Supplementary figures and images for: Mutation of IFNLR1, an interferon lambda receptor 1, is associated with autosomal-dominant non-syndromic hearing loss
Source: PubMed Central journal article supplement — J Med Genet. 2018 Feb 16;55(5):298–306. doi: 10.1136/jmedgenet-2017-104954 (PMC5931241; doi:10.1136/jmedgenet-2017-104954), 2018-02-16

Wild

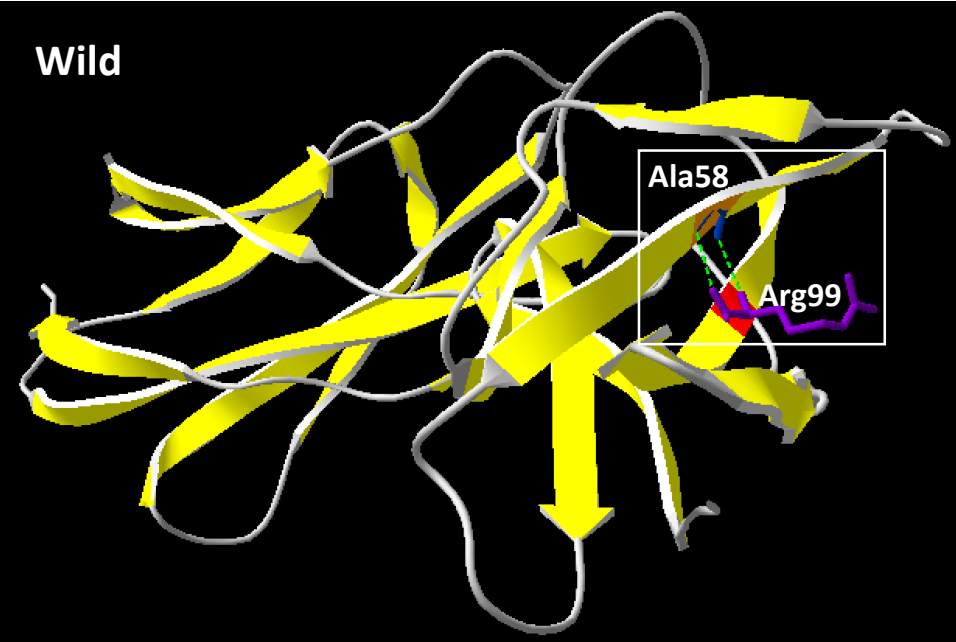

Mut

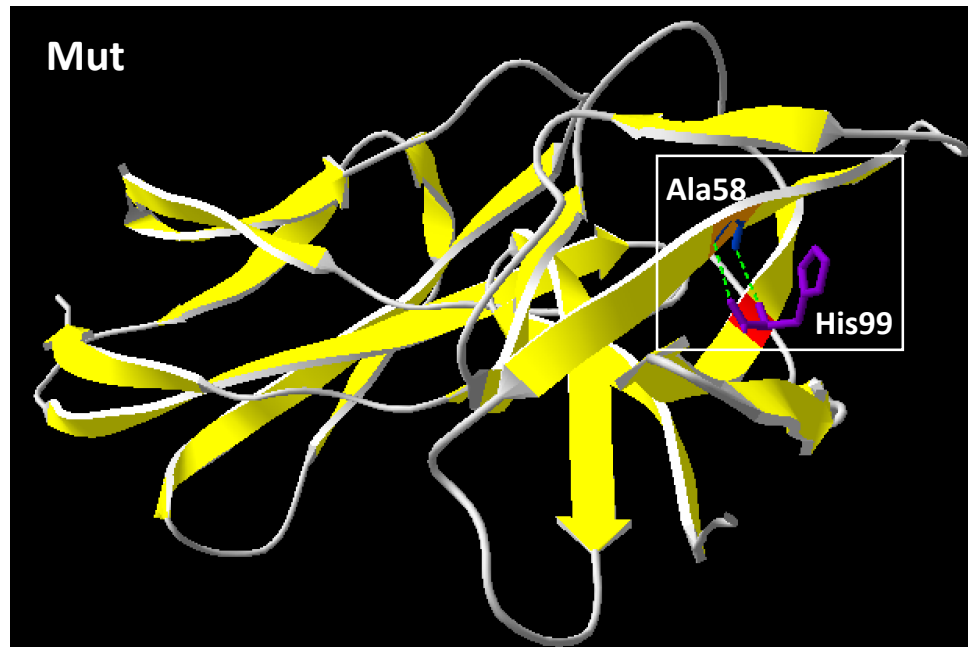

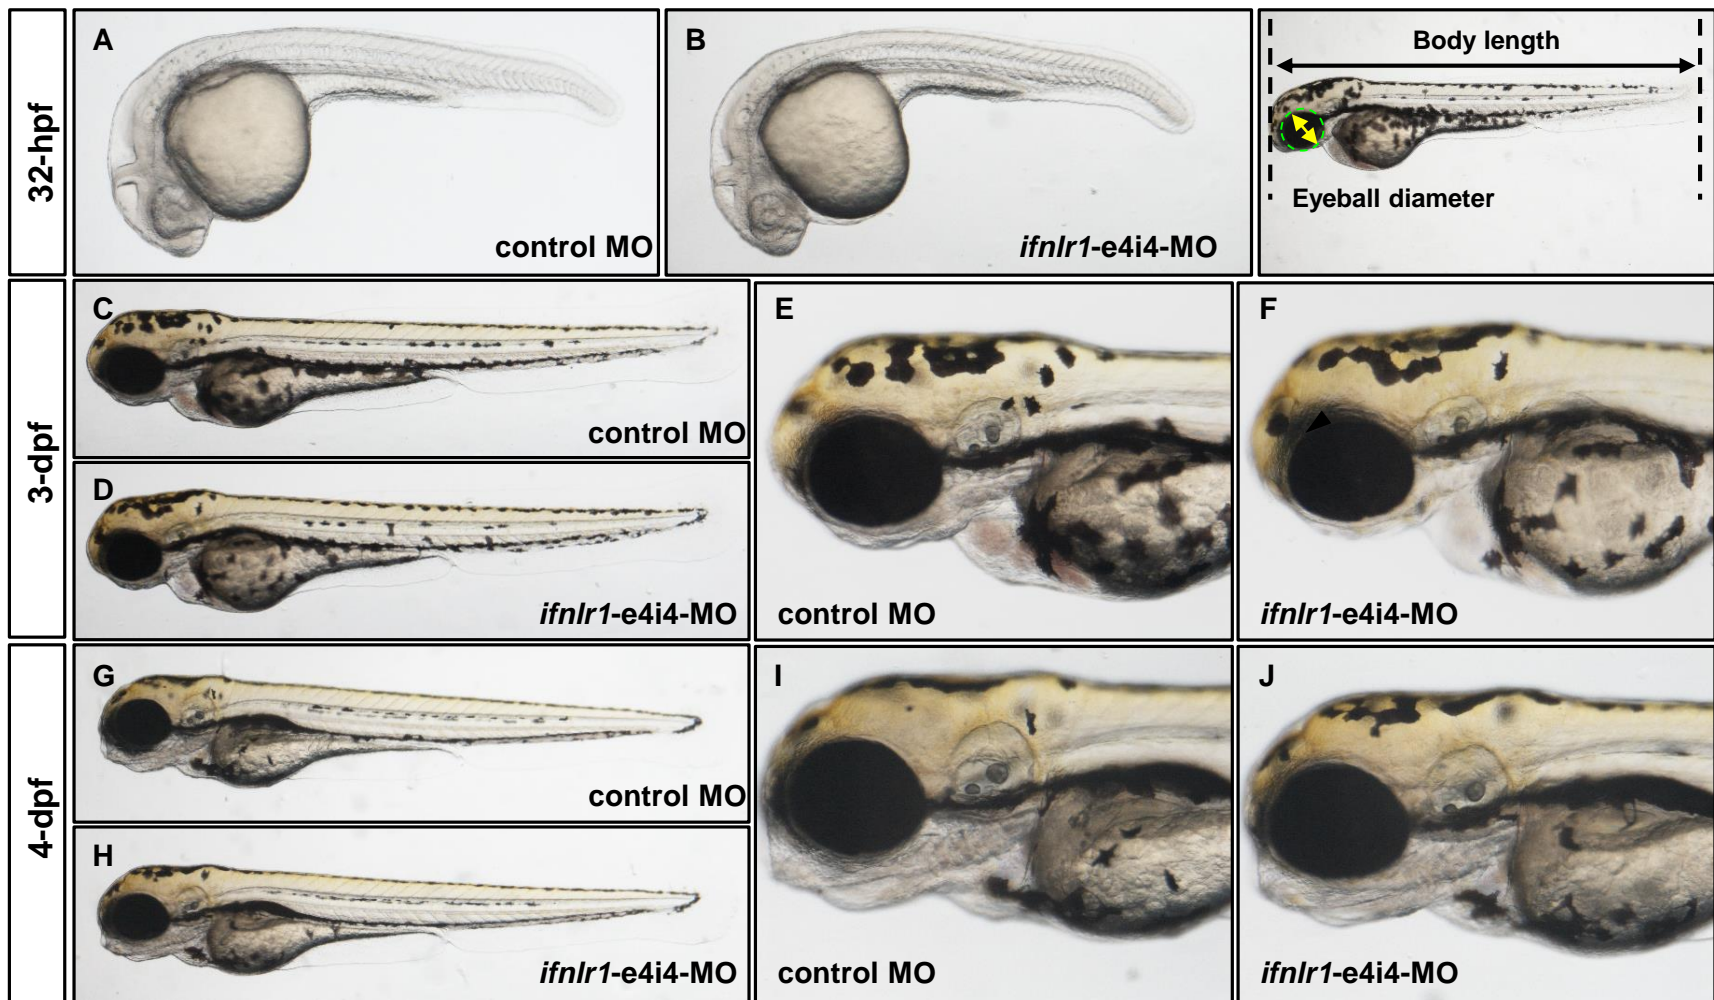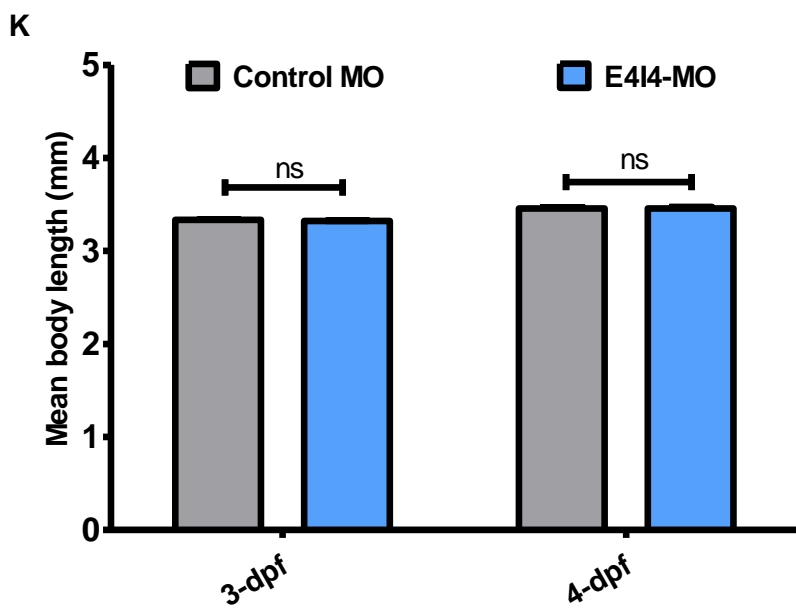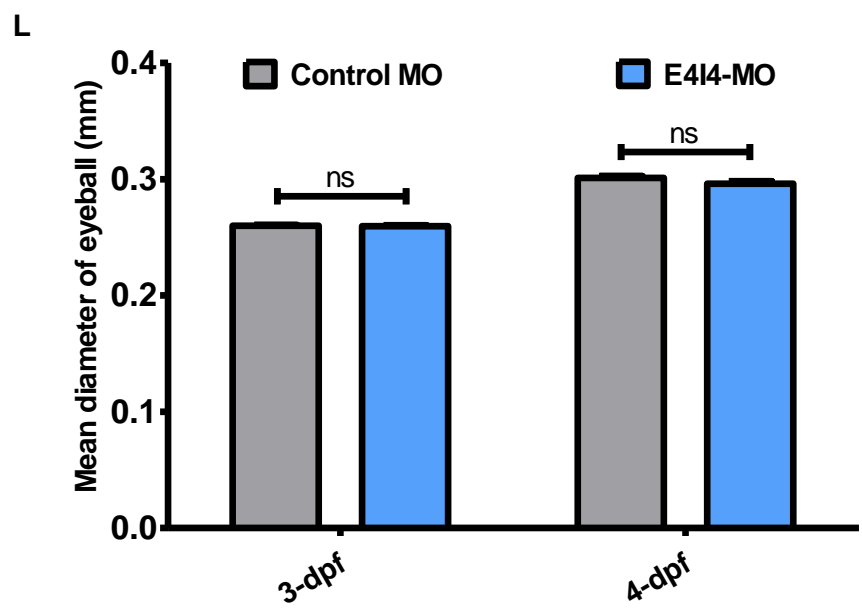

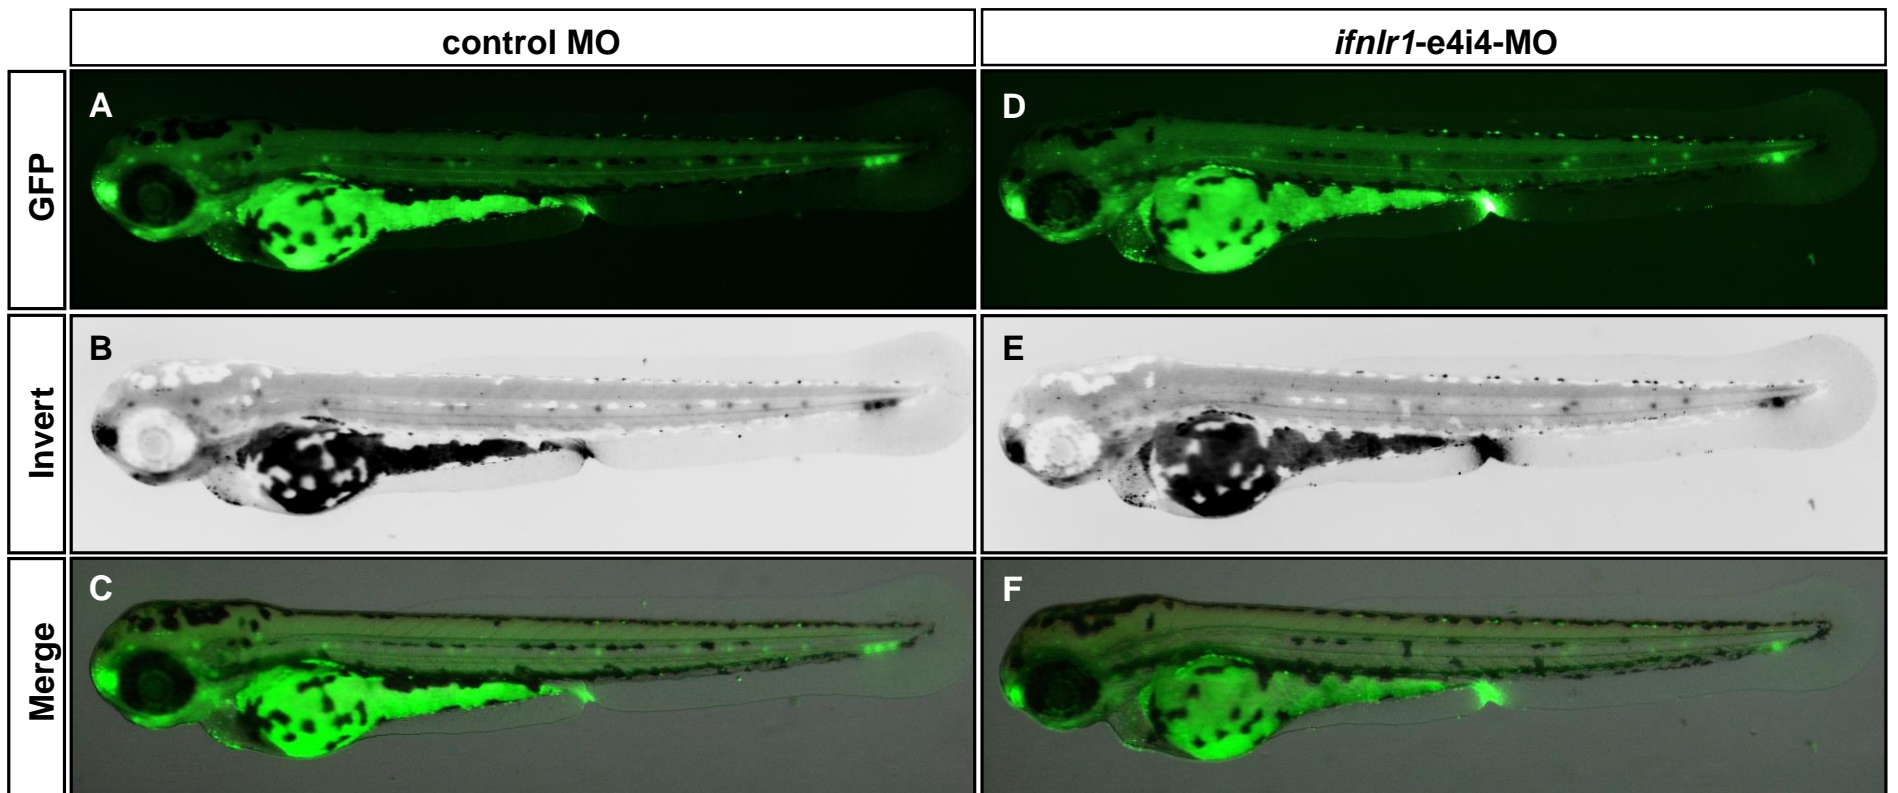



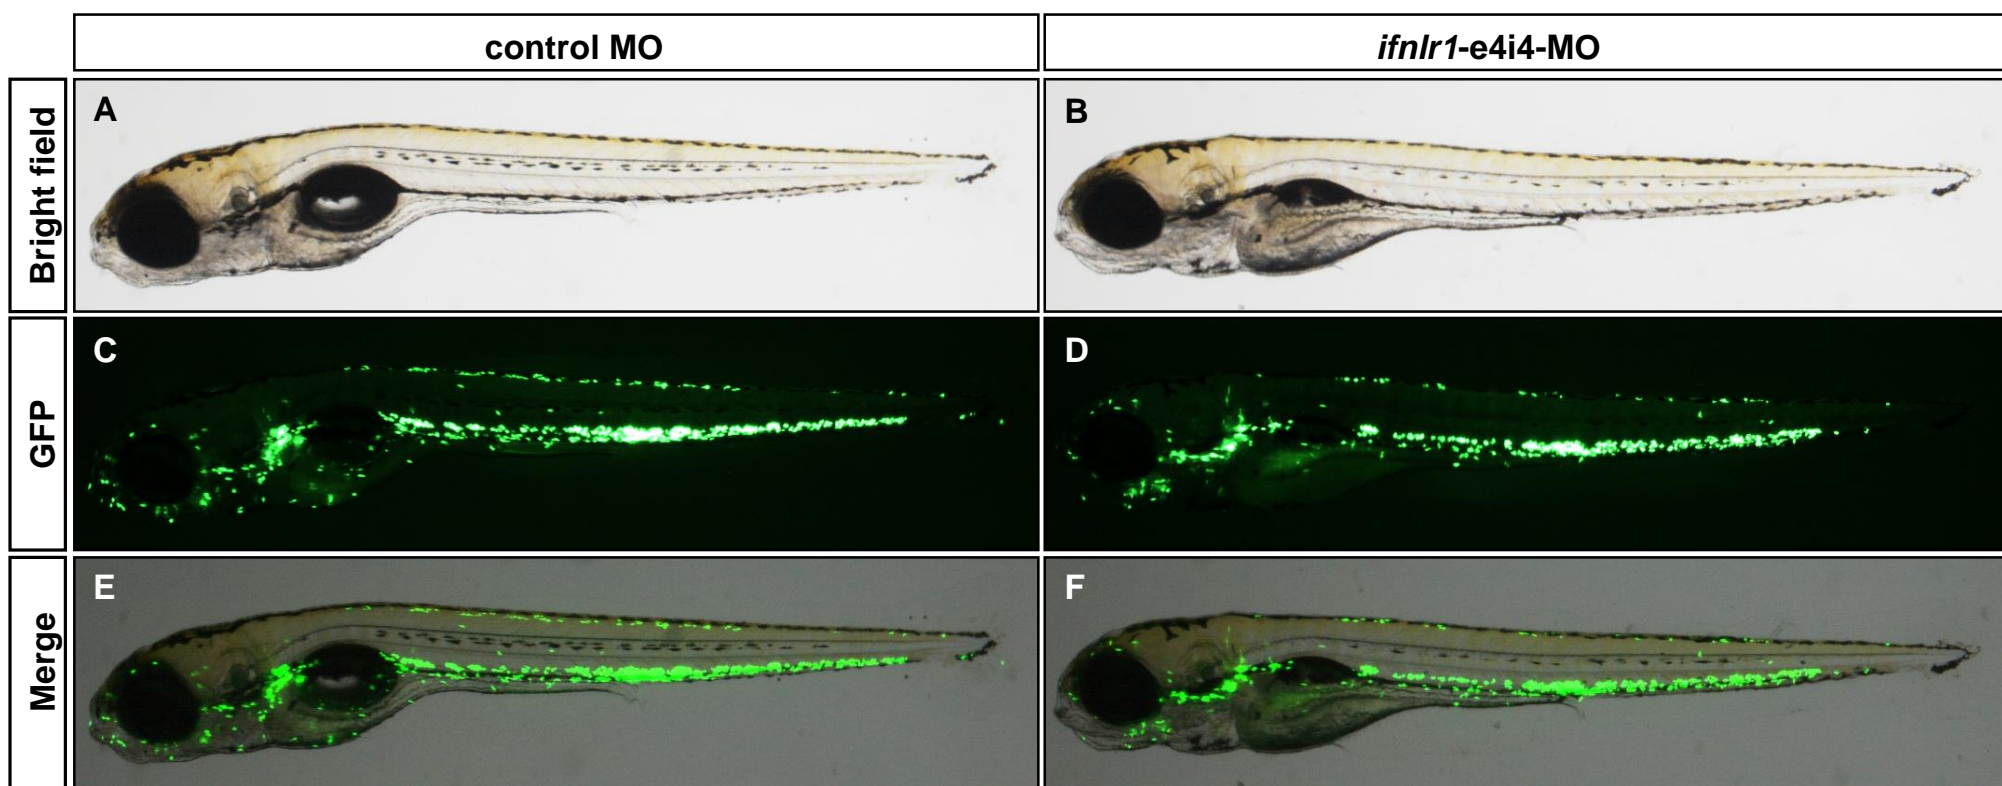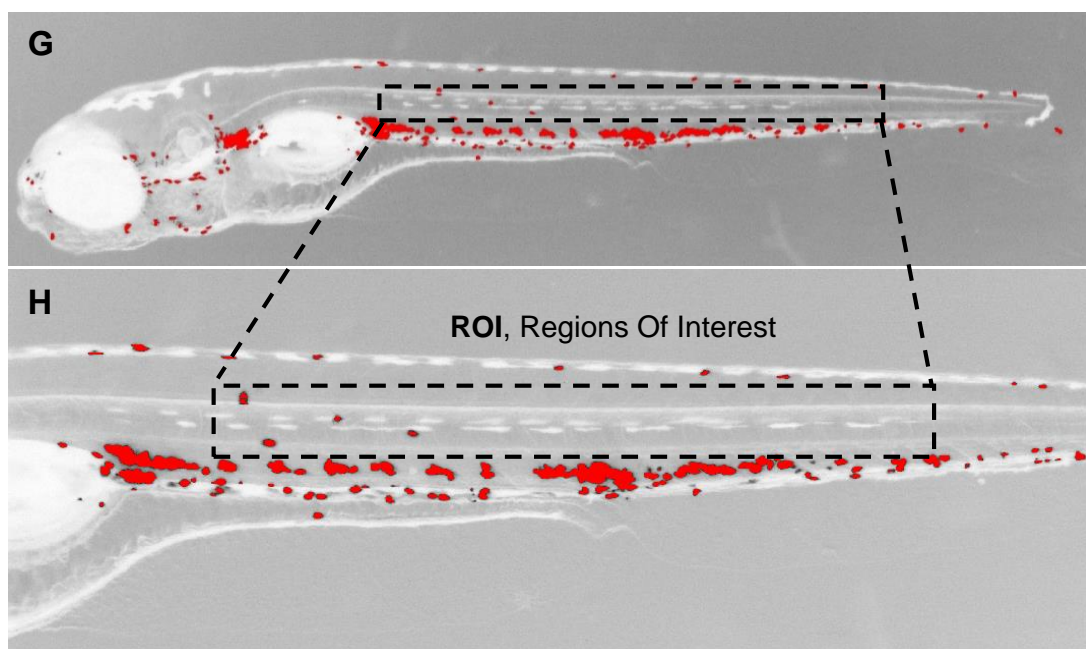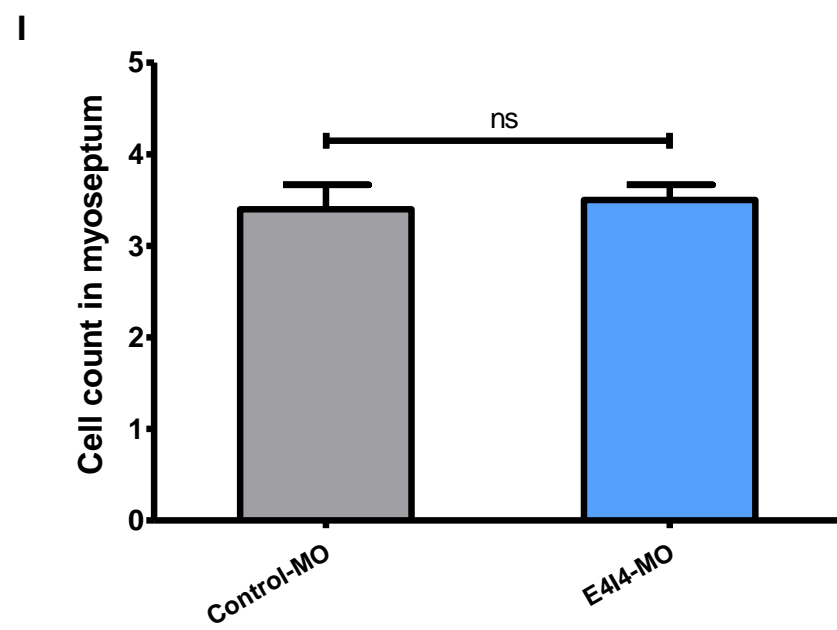

Supplement: jmedgenet-2017-104954supp001.pdf [file jmedgenet-2017-104954supp001.pdf]
